# Supplementary material for: Derivation of Soil Criteria of Cadmium for Safe Rice Production Applying Soil–Plant Transfer Model and Species Sensitivity Distribution
Source: MDPI journal article supplement (doi:10.3390/ijerph19148854), 2022-07-21
Supplement: s1 [file s1]

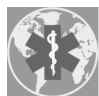

**Table S1.** The derived soil thresholds of Cd based on soil-plant transfer models.

| Protection levels<br>(%) | Soil thresholds |                |                |          |
|--------------------------|-----------------|----------------|----------------|----------|
|                          | pH ≤ 5.5        | 5.5 < pH ≤ 6.5 | 6.5 < pH ≤ 7.5 | pH > 7.5 |
| 95                       | 0.07            | 0.09           | 0.11           | 0.13     |
| 90                       | 0.10            | 0.12           | 0.15           | 0.18     |
| 80                       | 0.15            | 0.18           | 0.22           | 0.27     |
| 50                       | 0.33            | 0.40           | 0.49           | 0.59     |
| 20                       | 0.72            | 0.87           | 1.07           | 1.31     |
| 10                       | 1.08            | 1.31           | 1.61           | 1.99     |
| 5                        | 1.51            | 1.85           | 2.27           | 2.82     |

The thresholds at soil pH values of 5.0, 6.0, 7.0, and 8.0 were used for scenarios of soil pH ≤ 5.5, 5.5 < pH ≤ 6.5, 6.5 < pH ≤ 7.5, and pH > 7.5, respectively.

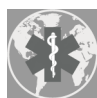

**Table S2.** The derived soil thresholds of Cd based on species sensitivity distribution.

| Protection levels<br>(%) | Soil thresholds |                |                |          |
|--------------------------|-----------------|----------------|----------------|----------|
|                          | pH ≤ 5.5        | 5.5 < pH ≤ 6.5 | 6.5 < pH ≤ 7.5 | pH > 7.5 |
| 95 (HC <sub>5</sub> )    | 0.06            | 0.08           | 0.14           | 0.09     |
| 90 (HC <sub>10</sub> )   | 0.09            | 0.13           | 0.25           | 0.15     |
| 80 (HC <sub>20</sub> )   | 0.14            | 0.24           | 0.50           | 0.30     |
| 50 (HC <sub>50</sub> )   | 0.35            | 0.76           | 1.89           | 1.03     |
| 20 (HC <sub>80</sub> )   | 1.05            | 2.43           | 7.10           | 3.57     |
| 10 (HC <sub>90</sub> )   | 2.22            | 4.47           | 14.18          | 6.84     |
| 5 (HC <sub>95</sub> )    | 4.63            | 7.39           | 25.12          | 11.70    |
